# Supplementary material for: Signature of tropical fires in the diurnal cycle of tropospheric CO as seen from Metop-A/IASI
Source: Copernicus journal article supplement (doi:10.5194/acp-15-13041-2015), 2015-11-25
Supplement: Supplementary file 1 [file acp-15-13041-2015-supplement.pdf]

Supplement of Atmos. Chem. Phys., 15, 13041–13057, 2015  
<http://www.atmos-chem-phys.net/15/13041/2015/>  
doi:10.5194/acp-15-13041-2015-supplement  
© Author(s) 2015. CC Attribution 3.0 License.

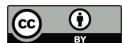

*Supplement of*

## **Signature of tropical fires in the diurnal cycle of tropospheric CO as seen from Metop-A/IASI**

**T. Thonat et al.**

*Correspondence to:* T. Thonat ([thibaud.thonat@lmd.polytechnique.fr](mailto:thibaud.thonat@lmd.polytechnique.fr))

The copyright of individual parts of the supplement might differ from the CC-BY 3.0 licence.

## Supplementary materials

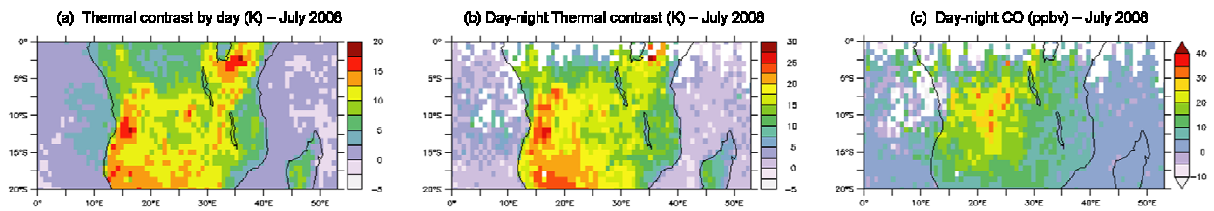

Figure S1. (a) Thermal contrast by day (in K), in July 2008 in southern Africa. (b) Day-night difference of the thermal contrast (in K). (c) Day-night difference of IASI CO (in ppbv).

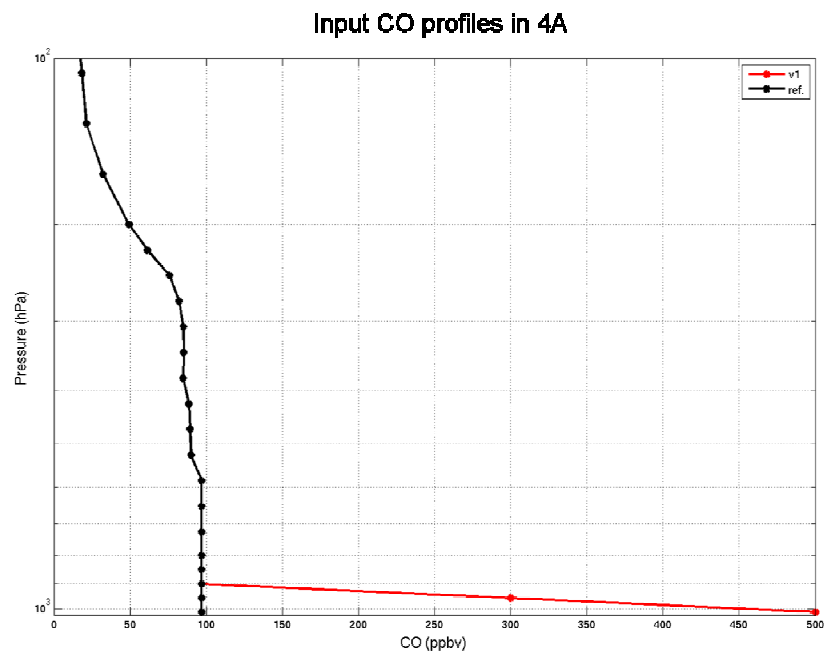

Figure S2. Black: reference profile of CO used as input in 4A for the retrieval of IASI CO (in ppbv). Red: a polluted profile in the boundary layer.
